# Supplementary material for: The E3 ubiquitin ligase Itch is required for B-cell development
Source: PubMed Central journal article supplement (PMC6344599; doi:10.1038/s41598-018-36844-9), 2019-01-23
Supplement: 41598_2018_36844_MOESM1_ESM.pdf [file 41598_2018_36844_MOESM1_ESM.pdf]

**The E3 ubiquitin ligase Itch is required for B-cell development**

Xiaoling Liu, Yu Zhang, Yinxiang Wei, Zhiding Wang, Gaizhi Zhu, Ying Fang, Bing Zhai, Ruonan Xu, Gencheng Han, Guojiang Chen, He Xiao, Chunmei Hou, Beifen Shen, Yan Li, Ning Ma, Renxi Wang

## Supplementary Figure 1

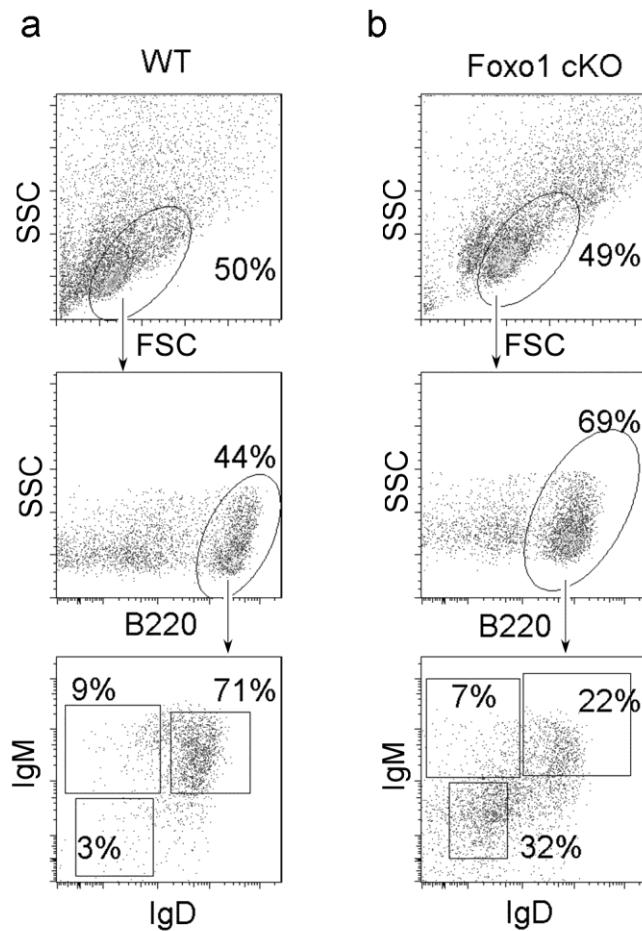

**Supplementary Figure 1** The gating strategy for analysis and sorting of splenic B-cell subpopulations. Briefly, splenocytes from 7-9-week-old C57BL/6 mice (Wild type, WT) (a) and  $CD19^{cre}Foxo1^{F/F}$  (Foxo1 conditional knock out, Foxo1 cKO) (b) mice were purified using lymphocytes separate solution. Splenic lymphocytes were staining with anti-mouse B220, IgM, and IgD antibodies. Gated on B220<sup>+</sup> B cells, mature B cells (IgM<sup>+</sup>IgD<sup>+</sup>), immature B cells (IgM<sup>+</sup>IgD<sup>-</sup>), and small resting pre-B cells (IgM<sup>-</sup>IgD<sup>+</sup>) that transited to the periphery were analyzed and sorted by flow cytometry (FACS). Numbers in quadrants indicate percent cells in each.

## Supplementary Figure 2

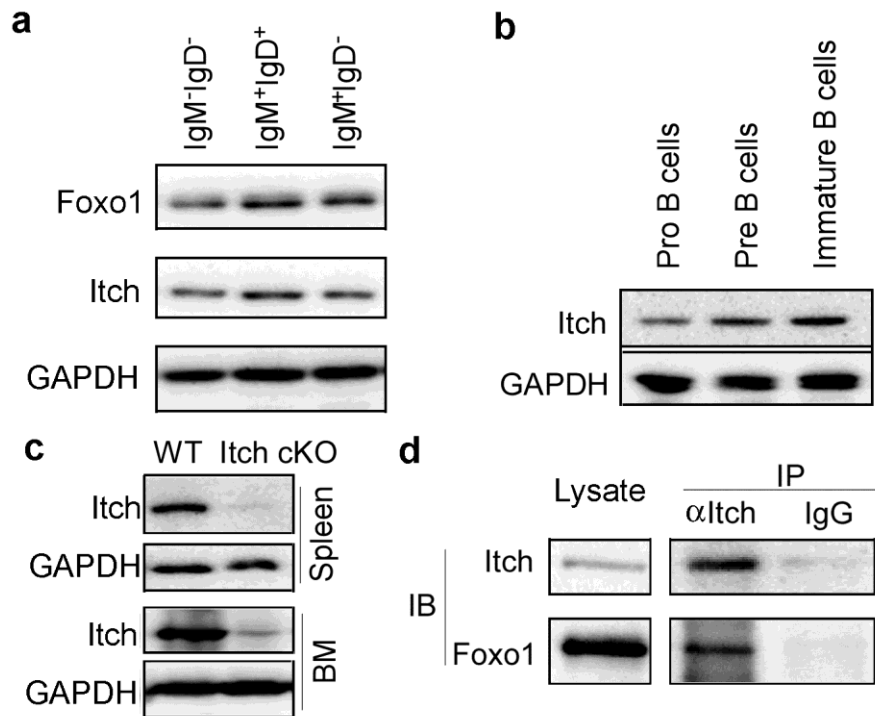

**Supplementary Figure 2** Itch protein expression in B cells. Immunoblot analysis in purified mouse splenic B cell populations (IgM<sup>-</sup>IgD<sup>-</sup>, IgM<sup>+</sup>IgD<sup>-</sup> and IgM<sup>+</sup>IgD<sup>+</sup> B cells) sorted from 7-9-week-old C57BL/6 mice by FACS described in supplementary figure 1a (**a**), purified bone marrow (BM) cell populations (CD43<sup>+</sup>B220<sup>+</sup>CD19<sup>+</sup>IgM<sup>-</sup> pro B cells, B220<sup>+</sup>CD19<sup>+</sup>CD43<sup>-</sup>IgM<sup>-</sup> pre-B cells and B220<sup>+</sup>CD19<sup>+</sup>CD43<sup>-</sup>IgM<sup>+</sup>IgD<sup>-</sup> immature B cells) sorted from 7-9-week-old C57BL/6 mice (**b**), and purified B cells sorted from the spleen (upper two panels) and bone marrow (lower two panels) of 7-9-week-old CD19<sup>WT</sup>Itch<sup>F/F</sup> (wild type, WT) and CD19<sup>Cre</sup>Itch<sup>F/F</sup> (Itch conditional knock out, Itch cKO) mice by using B220 microbeads (**c**). (**d**) Splenic B cells were sorted from 7-9-week-old C57BL/6 mice by using B200 microbeads and subjected to immunoprecipitation with anti-Itch antibodies (αItch) and isotype control IgG (IgG) and immunoblotting with antibodies that were reactive to the indicated proteins.

Aliquots of total cell lysates were similarly immunoblotted. Shown are the results of one representative experiment out of three.

Supplementary Figure 3

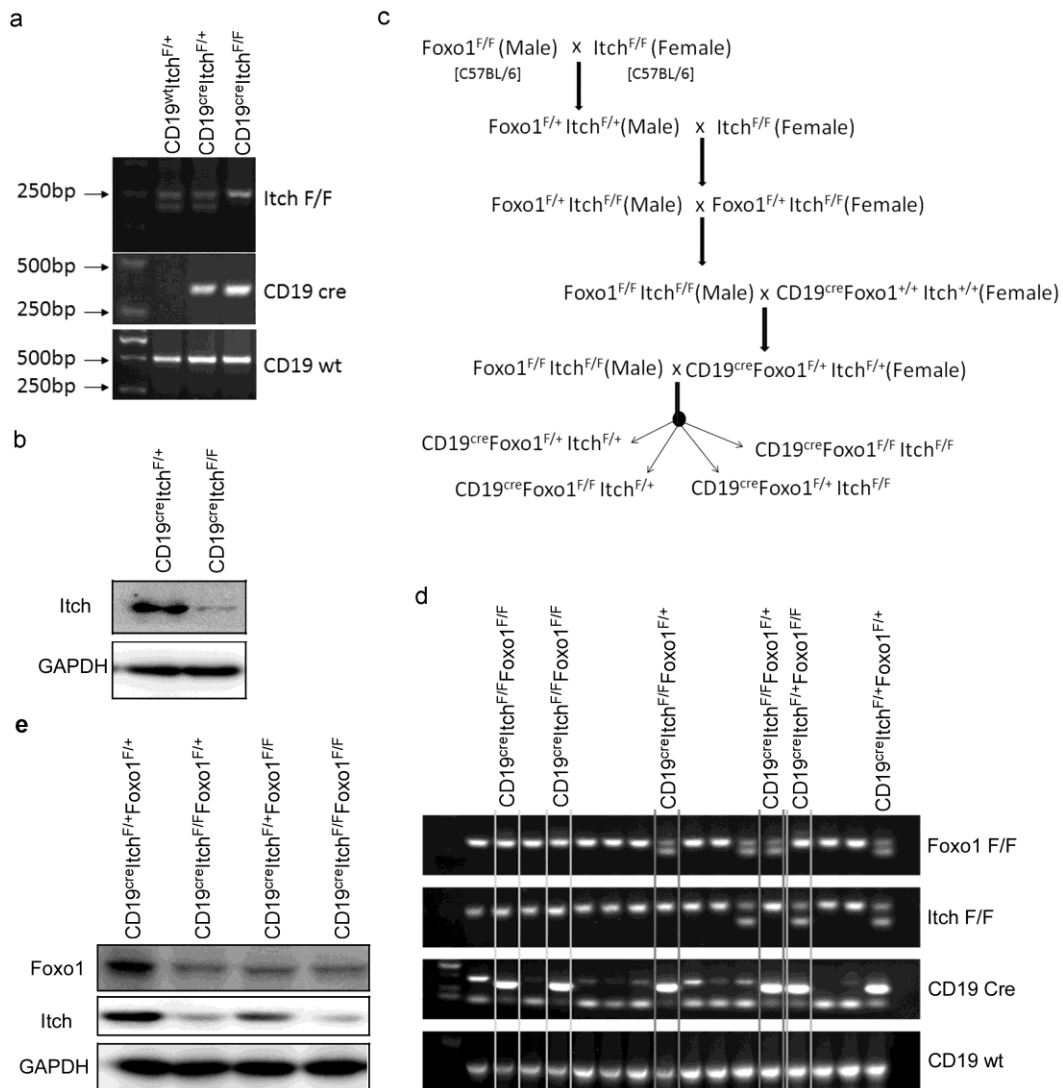

**Supplementary Figure 3** Efficiency of deletion of Itch, Foxo1, or Foxo1 and Itch in Cre-systems. **(a, d)** Genotype identification of CD19<sup>WT</sup>Itch<sup>F/+</sup>, CD19<sup>cre</sup>Itch<sup>F/+</sup>, and CD19<sup>cre</sup>Itch<sup>F/F</sup> mice **(a)** and CD19<sup>cre</sup>Itch<sup>F/+</sup>Foxo1<sup>F/+</sup>, CD19<sup>cre</sup>Itch<sup>F/F</sup>Foxo1<sup>F/+</sup>, CD19<sup>cre</sup>Itch<sup>F/+</sup>Foxo1<sup>F/F</sup>, and CD19<sup>cre</sup>Itch<sup>F/F</sup>Foxo1<sup>F/F</sup> mice **(d)** by tail-PCR assay. **(c)** The breeding scheme for the double conditional knockout mice. **(b, e)** Western blot analysis for Itch and Foxo1 protein expression from splenic B cells purified from CD19<sup>cre</sup>Itch<sup>F/+</sup> and CD19<sup>cre</sup>Itch<sup>F/F</sup> mice **(b)**, or CD19<sup>cre</sup>Itch<sup>F/+</sup>Foxo1<sup>F/+</sup>, CD19<sup>cre</sup>Itch<sup>F/F</sup>Foxo1<sup>F/+</sup>, CD19<sup>cre</sup>Itch<sup>F/+</sup>Foxo1<sup>F/F</sup>, and CD19<sup>cre</sup>Itch<sup>F/F</sup>Foxo1<sup>F/F</sup> mice **(e)**.

## Supplementary Figure 4

a

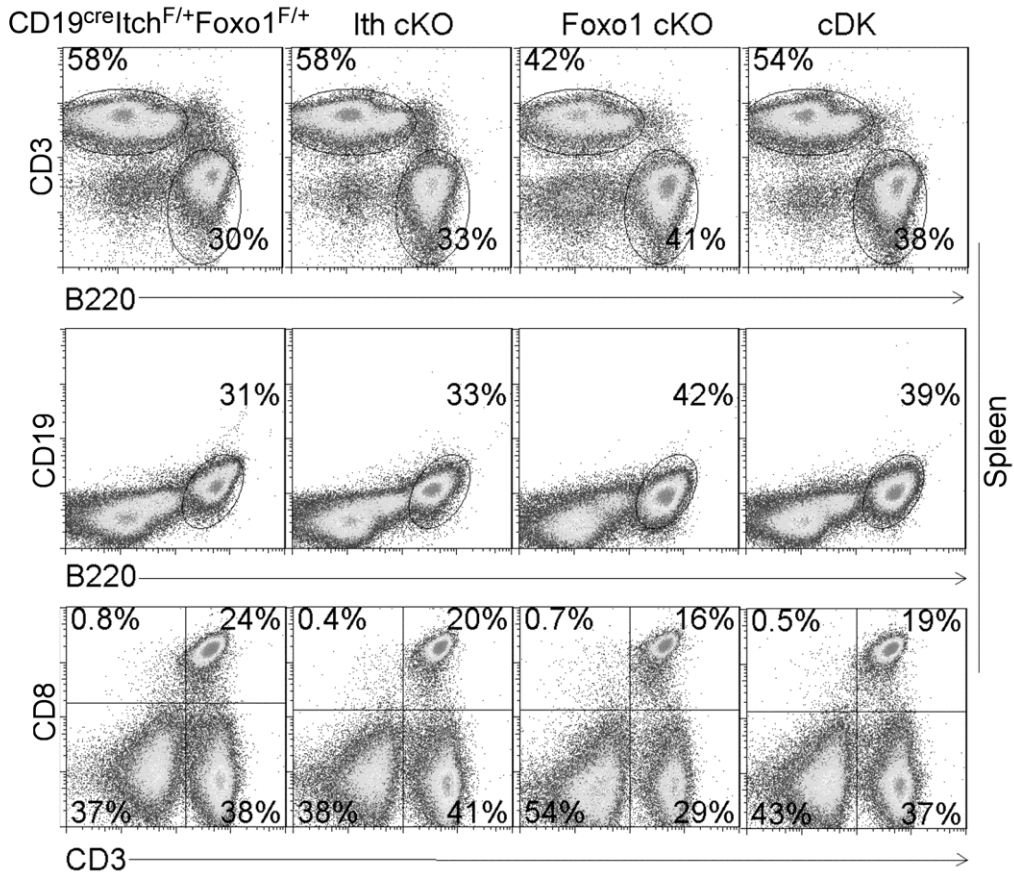

b

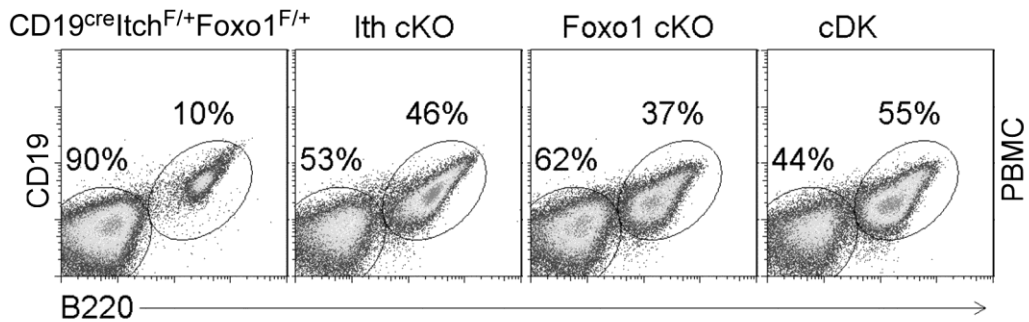

**Supplementary Figure 4** B cells increase in PBMC but not spleen from both Itch cKO and Foxo1 cKO. Representative flow cytometry profiles of CD3<sup>+</sup>T cells, B220<sup>+</sup> B cells, CD19<sup>+</sup>B220<sup>+</sup> B cells, and CD8<sup>+</sup>CD3<sup>+</sup> T cells in spleen (a), and CD19<sup>+</sup>B220<sup>+</sup> B cells in PBMC (b) from CD19<sup>cre</sup>Itch<sup>F/+</sup>Foxo1<sup>F/+</sup>, CD19<sup>cre</sup>Itch<sup>F/F</sup>Foxo1<sup>F/+</sup>, CD19<sup>cre</sup>Itch<sup>F/+</sup>Foxo1<sup>F/F</sup>, and CD19<sup>cre</sup>Itch<sup>F/F</sup>Foxo1<sup>F/F</sup> mice (n = 6 mice per group, 7~9

weeks old). Numbers in quadrants indicate percent cells in each. Results represent at least five independent experiments (n = 6 per group).

### Supplementary Figure 5

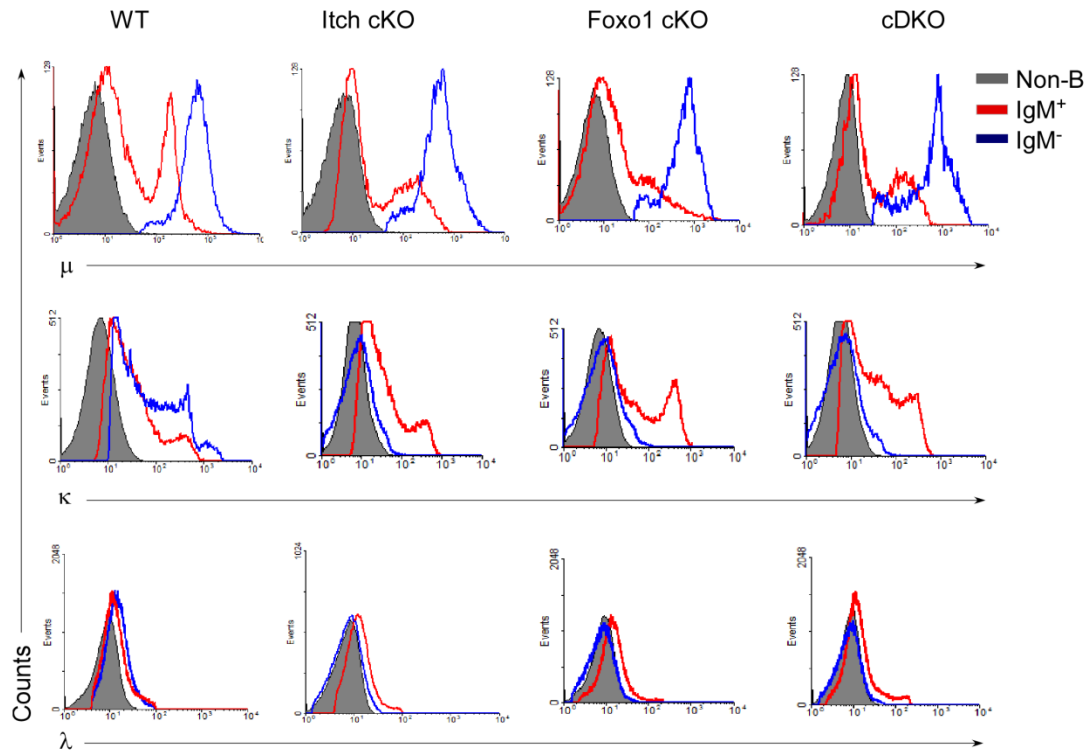

**Supplementary Figure 5** IgM<sup>-</sup>IgD<sup>-</sup> B cells from Itch cKO, Foxo1 cKO, and Itch-Foxo1 cDK mice are small resting pre-B cells. Expression of intracellular  $\mu$  heavy chain and  $\kappa$  or  $\lambda$  light chain in splenic IgM<sup>+</sup> (red), IgM<sup>-</sup> (blue) B cells, and non-B cells (shaded gray). FACS plots are representative of 3 mice/group.



## Supplementary Figure 6

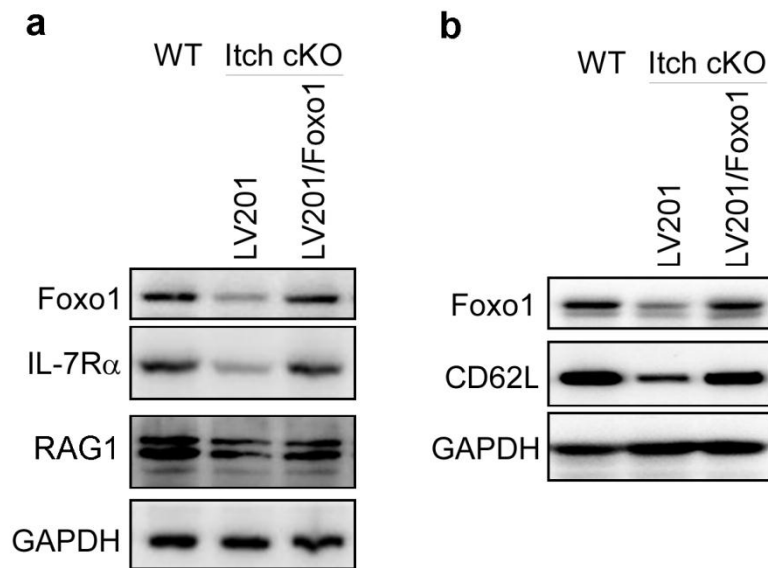

**Supplementary Figure 6** Itch regulates RAG, IL-7R $\alpha$  and CD62L expression via Foxo1. (a) BM CD43<sup>+</sup>B220<sup>+</sup>CD19<sup>+</sup>c-kit<sup>+</sup> pro-B cells from Itch cKO and its littermates were sorted by FACS. The whole bone marrow cells were collected and cultured in a culture flask. After 4 days of incubation in a 37C, 5% CO<sub>2</sub> humidified incubator, the nonadherent cells were removed from the cultures by gentle aspiration and the adherent cells were collected as primary stroma cells. 1 x 10<sup>6</sup> pro-B cells per ml and 1 x 10<sup>5</sup> irradiated primary stroma cells per ml were cultured in a six well tissue culture plate in 2 ml antibiotic-free normal growth medium supplemented with FBS in the presence of recombinant mouse IL-7 (100 U/ml). At the same time, 1 x 10<sup>6</sup> infectious units of virus (IFU) of negative control lentivirus (LV201), Foxo1-expressing lentivirus (LV201/Foxo1) and 10  $\mu$ g/ml polybrene were added into the culture. On day 3 after infection, the cells were collected and analyzed by western blot. Immunoblot analysis of Foxo1, IL-7R $\alpha$ , and RAG1 was shown (n = 3 mice per group, 7~9 weeks old). (b) Splenic B cells from Itch cKO and its littermates were

sorted by CD19 microbeads.  $1 \times 10^6$  B cells per ml were cultured in a six well tissue culture plate in 2 ml antibiotic-free normal growth medium supplemented with FBS. At the same time,  $1 \times 10^6$  infectious units of virus (IFU) of negative control lentivirus (LV201), Foxo1-expressing lentivirus (LV201/Foxo1) and 10  $\mu$ g/ml polybrene were added into the culture. On day 3 after infection, cells were collected and analyzed by western blot. Immunoblot analysis of Foxo1 and CD62L was shown (n = 3 mice per group, 7~9 weeks old).

## Supplementary Figure 7

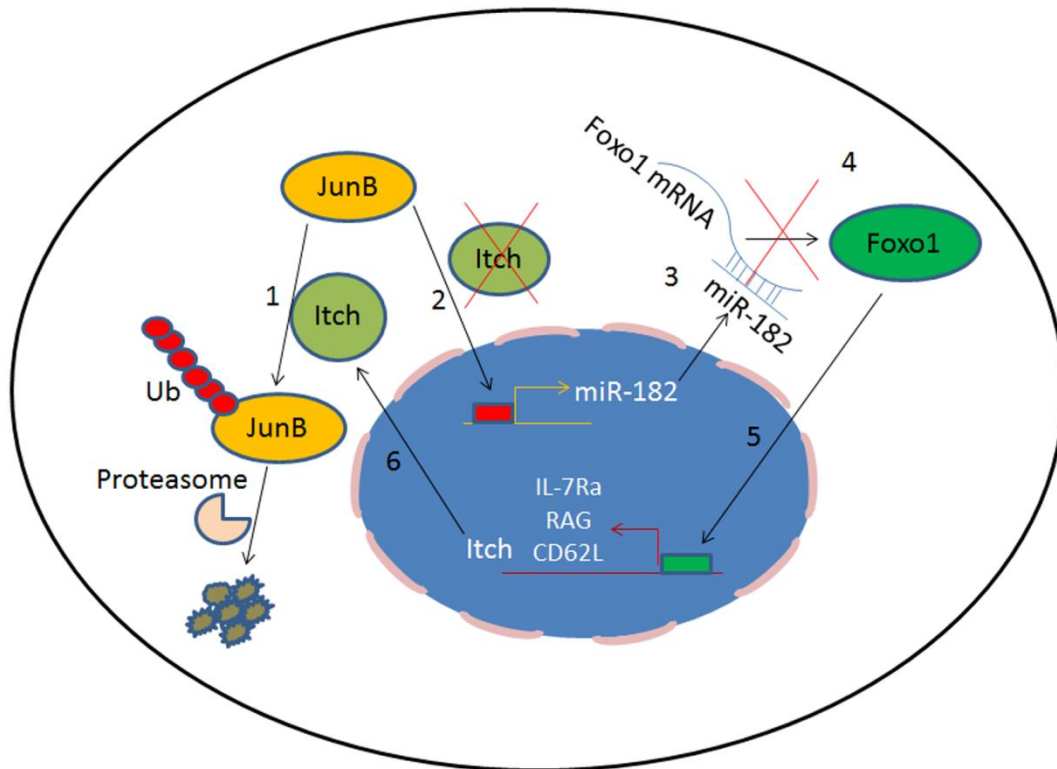

**Supplementary Figure 7** Scheme for novel regulatory axis in Itch-controlled Foxo1 expression in B cells. 1, Itch is molecularly associated with and induced ubiquitination of JunB which serves as a signal for proteasome- or lysosome-mediated degradation; 2, When Itch is deficient, JunB protein is up-regulated, enters into the nuclear, binds miR-182 promoter and as thus, miR-182 is up-regulated; 3, miR-182 destroyed Foxo1 mRNA by binding 3'-UTR of Foxo1. 4, Low copies of mRNA result in low level of Foxo1 protein; 5, Foxo1 enters into the nuclear and binds the promoters of its downstream molecules (RAG, IL-7Ra, CD62L, Itch, etc.); 6, Foxo1 induces ubiquitination of JunB by up-regulating Itch.

**Supplementary Figure 8**

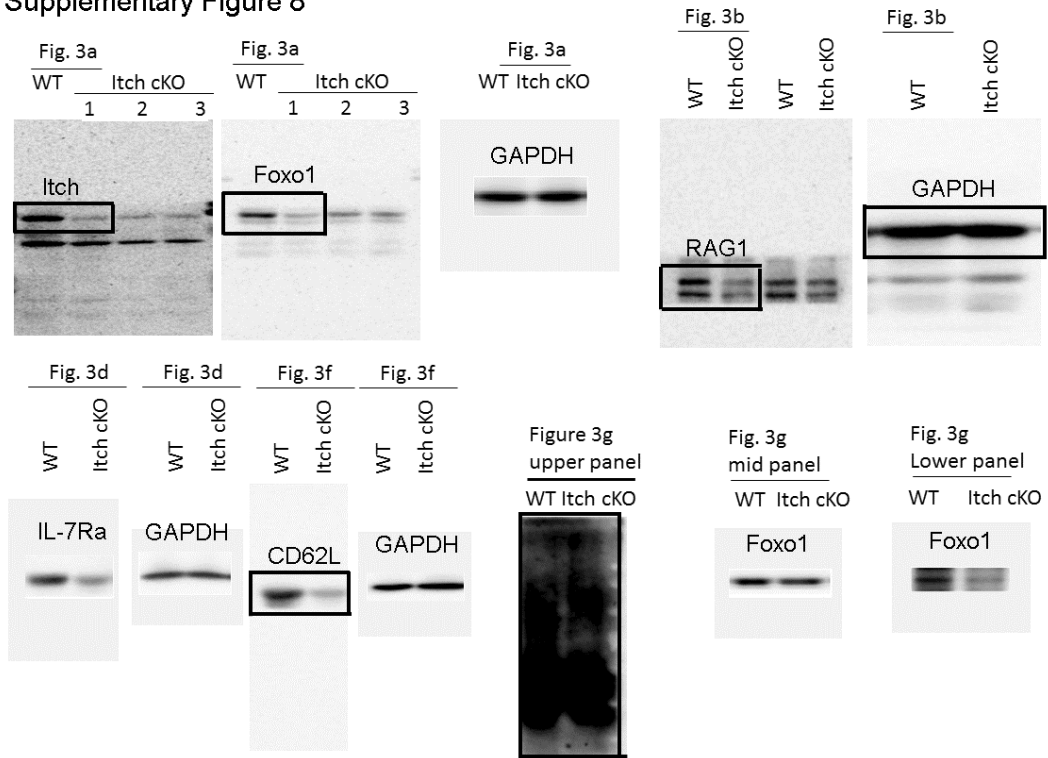

**Supplementary Figure 8** original scans for Figure 3a, 3b, 3d, 3f, and 3g.

Supplementary Figure 9

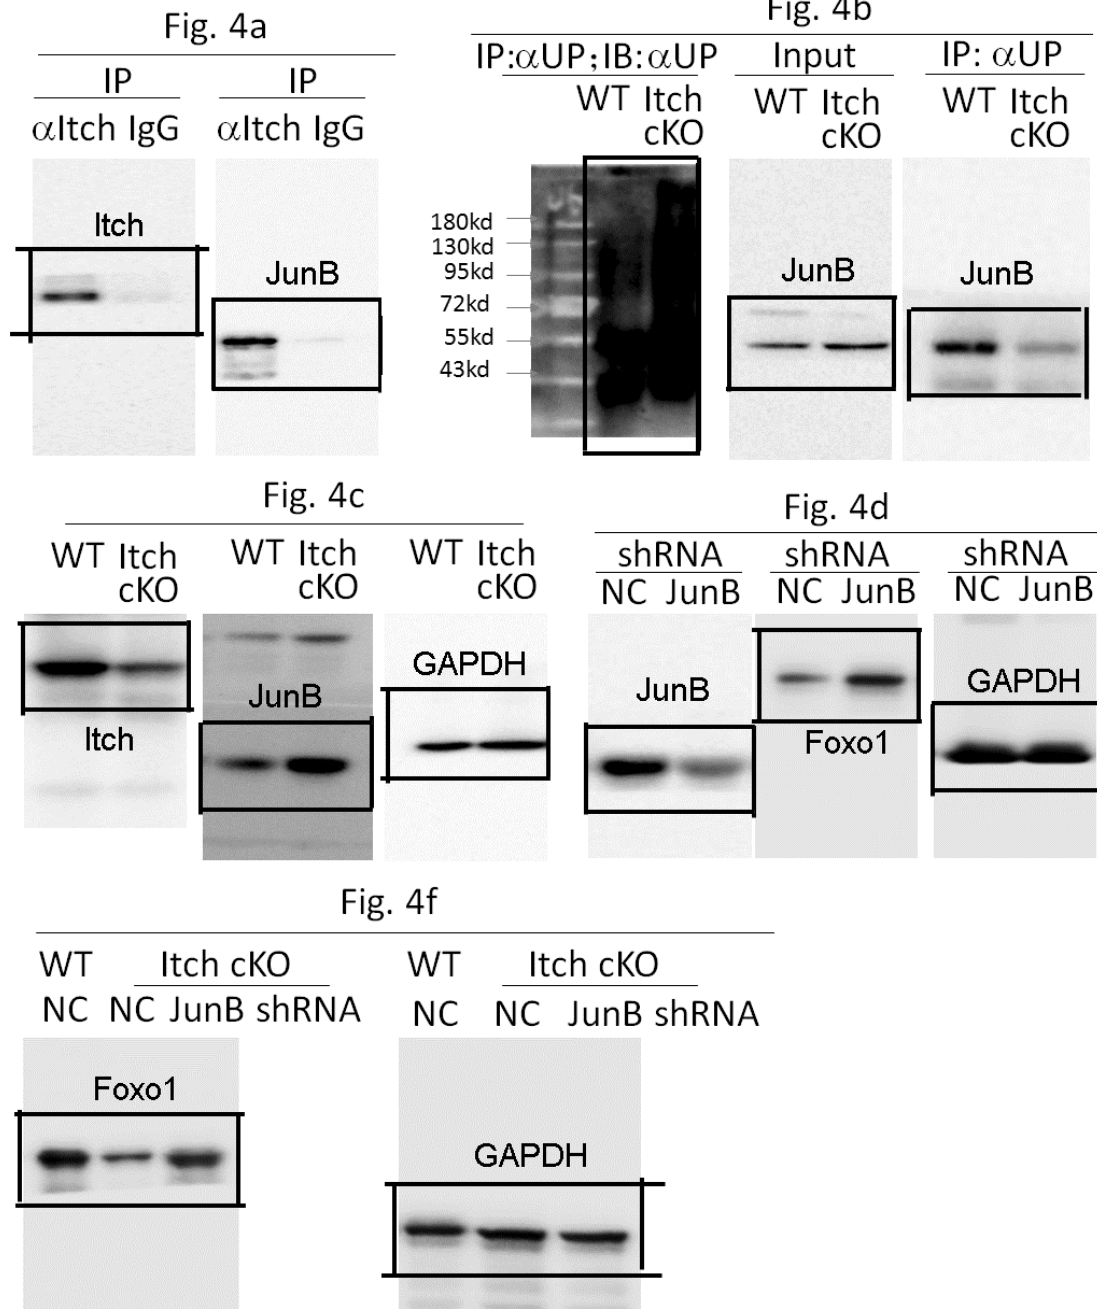

Supplementary Figure 9 original scans for Figure 4a, 4b, 4c, 4d, and 4f.

# Supplementary Figure 10

Fig. 6h

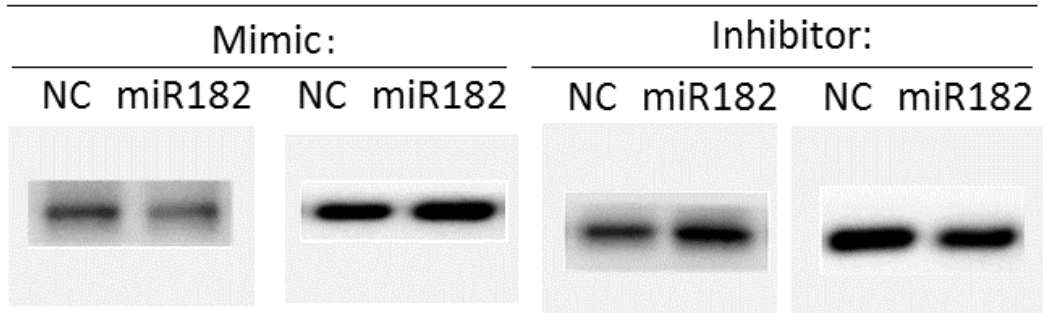

Supplementary Figure 10 original scans for Figure 6h.

Supplementary Figure 11

Fig. 7a

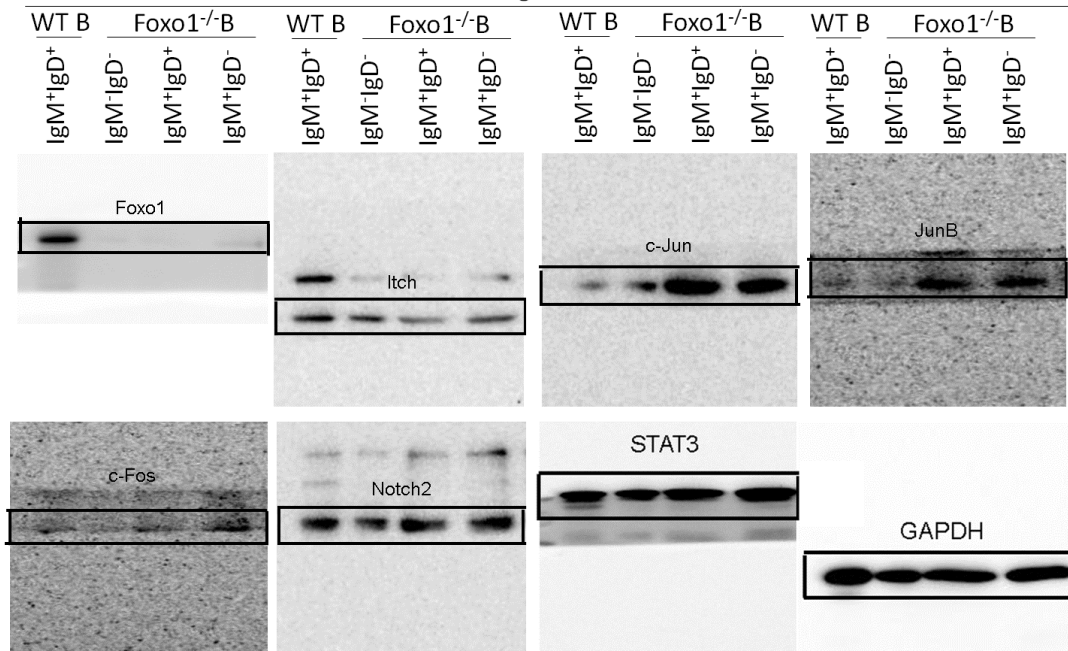

Fig. 7g

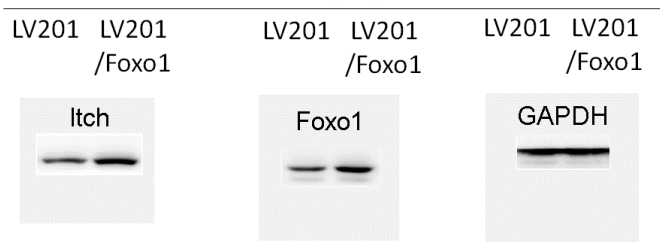

Supplementary Figure 11 original scans for Figure 7a and 7g.

Supplementary Figure 12

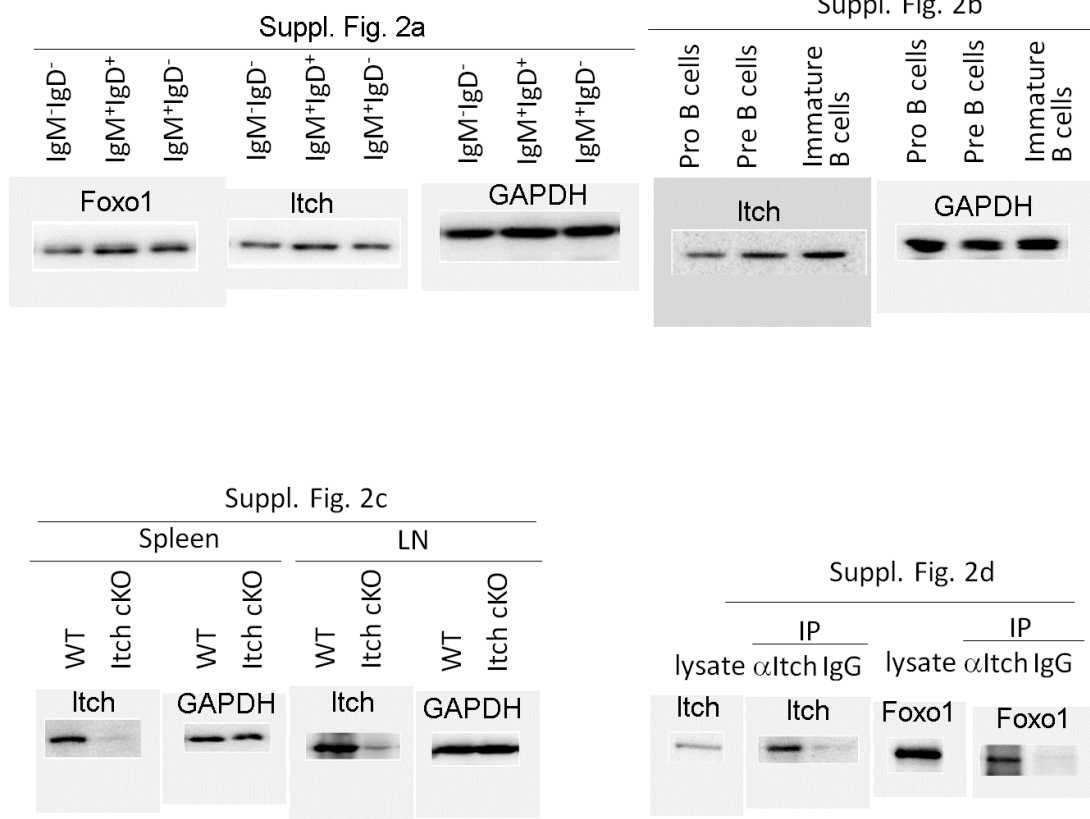

Supplementary Figure 12 original scans for Supplementary Figure 2a-d.



# Supplementary Figure 13

Suppl. Fig. 3b

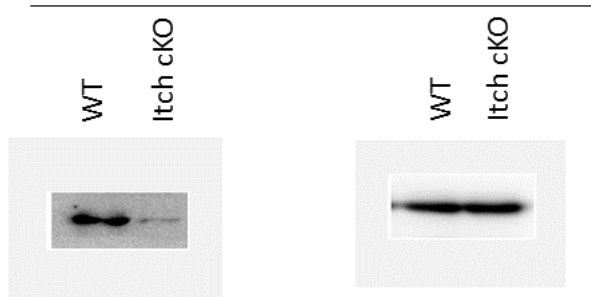

Suppl. Fig. 3e

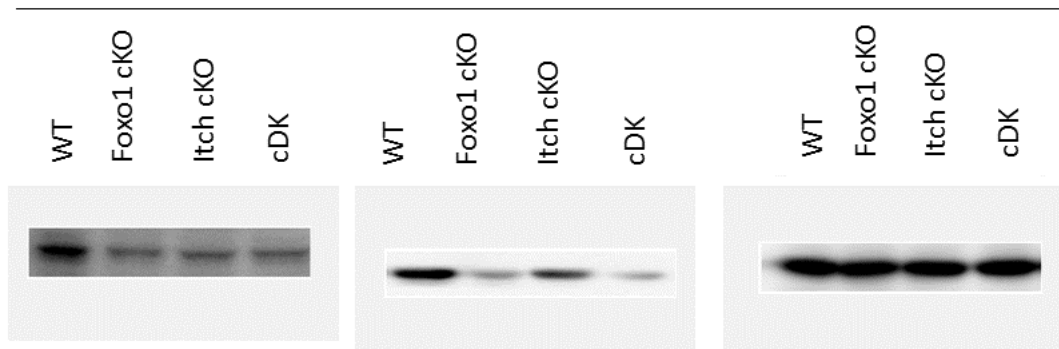

Supplementary Figure 13 original scans for Supplementary Figure 3a and 3e.

Supplementary Figure 14

Suppl. Fig. 6a

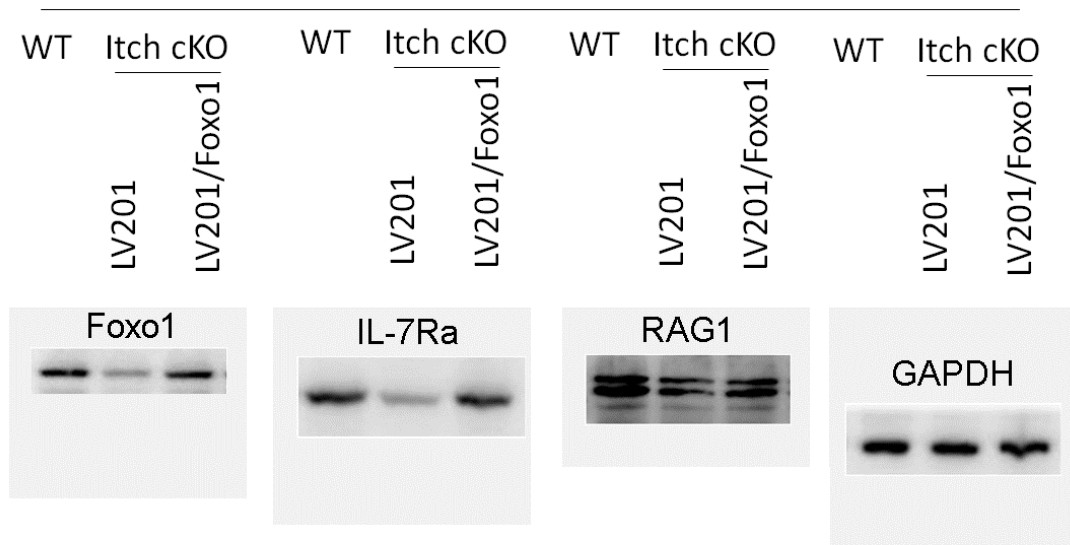

Suppl. Fig. 6b

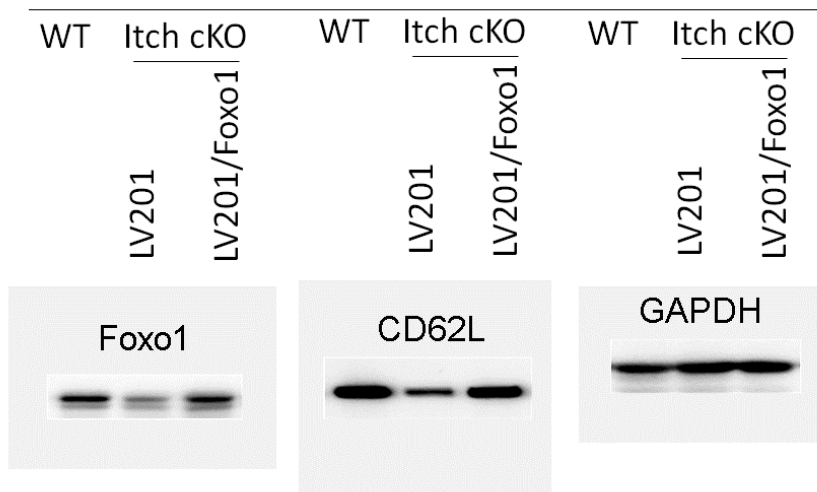

Supplementary Figure 14 original scans for Supplementary Figure 6a and 6b.

### Supplemental table I. Mouse Foxo1 promoter sequence.

Mouse Foxo1 promoter sequence was chose from start codon upstream -2465 to downstream +125 of Foxo1 gene:

```
TTTGTAACCAGGCAAAGGCAGGGAACCAGTAAGATGCTCAGTGACGTCCCACGCTTCAGTAAACTGACTTCACACACCACGA
ATAATCACCTCTATGAACCGTTTAAGGTGCATCTGTTATACAAACCTTTGTATTGGGGCATTGATTGTGCAGATTCTCTGACT
CTTTTCTTTTTTGGTCTTAGCATTGAGCTTAGGGTCCCCTCTGTAAAGCCTTGGCTGTACTAGCCTATACTATGACACTT
ATAGAAACAGTTGGGGACAGTGGCCTTAGAGAATTTGAAGATCTGGGGAAAGCTTAGGAAAACCTTTAACCAAATGCT
CTCATCGCAACAGTCCCTGAGAAACCGAAACAGAAATGAGGCGAAGGCCAAATTCACAGCTGGATTTCATCGCCAAGAATG
GTCTCTAGTGCTCCGCCTATTTGTAGGGTGC GGCTGTCTGACTGTGGGCCACCTCGGCAGAGTGTGATTACAAAGGAGCA
CCAGAGGGTTGTCTTTGTGGTCTGCTTAGGCTCATCCATTTACTCGAGTCTCCCAGCGGTTGCAAAGCCAAATTTGTAG
TCAAGTGTAAGAGACAGTTAACCAAACGTCTCGGCACCTCTGGTTCAGGATCGCCACTCAAACCTTTTATCAGTAGGCA
GCCGTTTCAGAAAAGGGATTATGAATAGGGGAATAGGGCCTGGATTAGCGAGACGTTAGAGACAAAGTGAAGGAGTAA
GAAGGCTGGTTTTCTTTTGGAGTCTCATTTTACATAGAAAACTCCACGTAAGAAAAGAGCGGAAGTACAACCGCAACAA
GACATTTGGAGCTGCGTTTTTGGACATATTTAAAGCCCTAATATGCATCTTCAATTCTAAAGCATCTAGCCAATAAAGAAAA
TGCCACCCATATTTCTTTTTTTTAAAAAGAAAGCAAATCAGAGGATCAAGCGAGGGAACATTTTCTTATTCTGTAAGGC
AAAAAGAACCCTGTCTTTCTACCTTTGGCTCCGCCGACGTGTGTTAGATACGCGGGTCTGGGAGCTCACTCTGTGAGTTT
AAAGAACTGAGGGGCGGAGCTGTGCCCAACACTTGGGGCTTATCTCTTTTGGCGACTCAACACCTCATCGCTTCCATGCT
AAATAAAAAAGAAATAAGCAAGCAGTTAACTTAATTAGGGTAATAAAGTGACAAAGTTGTCTTAAGCGCTCCTCTGACT
CTTTAGCCACCACACCGTCTCAGGAAAAAGTGAATTCCCGTGGCAGAAAAGCGGTTCCCATAGAAGACGTCGGATCTG
AGGCGTACTGGAGCTAGGTGCTTGTGCAACAGTGTCTCCCGCGCCGACCTCTCTGGGGTTCAGGATGAGTGGAGGCT
GGGGGTGAGCCGAGCCGAGAGGCTCGTCTTGCAAGTGTGCACAGGTAGGGTGGGAAGCGGTTACTCCGGAGCCGAGA
GCGACGGGTCTTACCAGGATCTGCGCGCTGGGGCGCCAGGGCAGATGCCAGCTTAAGAAAACATCTCCTCCAAAAC
AAACCCACCGACTTCCCGAGAGCTGCGCGAAGACGCGTGGGCGGAGCGGGCTTGAAGTGAATCCACGAGGCGCCCCACC
GCCCACGTCGCGTCCGGGAGCGCGCAGCGCCCCGCGCCATCCCGGAGTCAAGGCTGAGGCTCTGGGCTCTGCTGGAGTACTCGAT
TGCACTCTGTAGTAAACAAAAGTATGGTAGCCGCTCCACGCGGTTTTGCTCCTAGCAATCCGATCGCTGAGACGCCAGAG
ACTCAGAAACACTTGAGAATTACAGAAAATAATAACGGAGATTGGAAAAAAAAAAAAAAAAAGTGTGTGAGAAAGAAAAATAC
CCCACGCCCCCAACCACTACTGCCGCTCCCGAGGGAAGGCAGCGCCCGCCAGGCCCGCTTCAATGGCTGCTTCGG
CGGAGACTTCCGCGTCCATTGGCCGCGCAGCCTGTCTAGTCAAGGGCGGGGCGCGCGCGCCGCGGGCGGGGAGC
CCGCTGCAGATCCCGTAAGACGGGAGTCTGCGGAGTCTGCTTCACTCCCGCCCGCCACATTCAACAGGCAGCAGCGCCG
CTGTGCGCGCGCCGCGGAGACTAGAGCGGCCGACGCTCCGCCGCTGCTTGGCGTCCGCGGCCCTTGTACGCGGA
GCGCGGTGCCGAGCTGCCGGGCTCCGCGCCTGGTGGTGCCTTAGGCACGAACTCGGAGGCTCCTTAGACACCG
GTGACCCAGCGAAGTTAAGTCTGGGCGCTCCGTCCGCTGCGCCCCGCCGCGCTGACTCCGGCGTGCCTCCGCGTCCG
CGGCCCCCAATCTCGGAGCGACTCGGGTCCCGCTCCGCGCCCCGGTGGCCGCGTCTCCCGTACTTCTCTGCTGGT
GGGGGAGGGGCGGGGACCATGGCCGAAGCGCCCCAGGTGGTGGAGACCGACCCGACTTCGAGCCGCTGCCCCGCA
GCGCTCTGTACTGGCCGCTGCCAGGCCGAGTTAACAGTCCAACCTCGACCACCTCCAGTCC
```

We used the web-based software (<http://www.cbs.dtu.dk/services/Promoter/>) to identify potential promoter sequences. As expected, the sequence has obvious characteristics of promoter.

**Supplemental table II.** Predicted AP1 and JunB binding sites in Foxo1 promoter

| Model namer | Score | Relative score | Start | End  | Strand | Predicted site sequence |
|-------------|-------|----------------|-------|------|--------|-------------------------|
| FOS::JUN    | 8.68  | 0.92758162     | 1995  | 2001 | -1     | TGACTGA                 |
| FOS::JUN    | 7.614 | 0.888670875    | 161   | 167  | 1      | TGACTCT                 |
| FOS::JUN    | 7.614 | 0.888670875    | 1229  | 1235 | 1      | TGACTCT                 |
| FOS::JUN    | 6.836 | 0.860272602    | 2284  | 2290 | 1      | TGACCCA                 |
| FOS::JUN    | 6.696 | 0.855162373    | 55    | 61   | -1     | TTACTGA                 |
| FOS::JUN    | 6.656 | 0.853702308    | 1681  | 1687 | -1     | TGACTCC                 |
| FOS::JUN    | 6.656 | 0.853702308    | 2338  | 2344 | 1      | TGACTCC                 |
| FOS::JUN    | 6.574 | 0.850709173    | 1797  | 1803 | 1      | AGACTCA                 |
| JUNB        | 6.105 | 0.868819881    | 2281  | 2291 | 1      | CGGTGACCCAG             |
| FOS::JUN    | 5.729 | 0.819865291    | 620   | 626  | -1     | TGAACCA                 |
| FOS::JUN    | 5.723 | 0.819646281    | 243   | 249  | 1      | TGACACT                 |
| FOS::JUN    | 5.631 | 0.81628813     | 452   | 458  | 1      | TGACTGT                 |
| FOS::JUN    | 5.631 | 0.81628813     | 536   | 542  | 1      | TTACTCG                 |
| FOS::JUN    | 5.549 | 0.813294996    | 223   | 229  | 1      | TGTATCA                 |
| JUNB        | 5.371 | 0.859328383    | 1794  | 1804 | 1      | CAGAGACTCAG             |
| FOS::JUN    | 5.187 | 0.800081404    | 1340  | 1346 | 1      | TGCAACA                 |
| JUNB        | 5.046 | 0.855125745    | 1228  | 1238 | -1     | TAAAGAGTCAG             |
| JUNB        | 4.884 | 0.853030891    | 160   | 170  | -1     | AAAAGAGTCAG             |
| JUNB        | 3.69  | 0.837591043    | 1992  | 2002 | 1      | CTGTCAGTCAG             |
| JUNB        | 2.5   | 0.822202921    | 1678  | 1688 | 1      | CCGGGAGTCAG             |
| JUNB        | 2.491 | 0.82208654     | 2272  | 2282 | -1     | CGGTGTCTAAG             |
| JUNB        | 2.148 | 0.81765114     | 222   | 232  | -1     | TAGTGATACAG             |
| JUNB        | 1.996 | 0.815685598    | 730   | 740  | 1      | GAAGGAGTAAG             |
| JUNB        | 1.856 | 0.813875231    | 1199  | 1209 | 1      | AAGTGACAAAG             |
| JUNB        | 0.9   | 0.801513008    | 1860  | 1870 | 1      | GTGTGAGAAAG             |
| JUNB        | 0.854 | 0.800918173    | 158   | 168  | 1      | CTCTGACTCTT             |
| JUNB        | 0.854 | 0.800918173    | 1226  | 1236 | 1      | CTCTGACTCTT             |

We used the web (<http://jaspar.genereg.net/>) to analyze the binding sites of AP1 and

JunB in Foxo1 promoter sequence.

**Supplemental table III. Mouse miR-182 promoter sequence.**

Mouse miR-182 promoter sequence was chose from upstream -3000 of mature miRNA of miR-182 gene:

```
GTTGTGGCCTTTCATCCACCCACTAGTGTGGTTTCTGTCATCCTGGAGTCCCTGTGACTTAATGTCCTAAGCTGCCATA
TATGTATTATGTAACAATTGTGTATGTAAGCTCTGATCTCGAACAGCTGCACCAGTTTGTAAGAGTCATCTCACAGATGGAGG
GACAGGCTGGAGGTCCATTAGTAGTGAAGTAGGGTCGCTACCTCTTTCAGTCACGACAATGTATTGACCTCCAGTGGCCTT
GCTCTGTGGAGAGTGCTCACACACCCCTGCCCTGTGGCTGGGTGAATCTTGGCTCTGACCCTTCATATATCCCTGGCCTTC
AAAATGAGTTAGATCTGGACCTGGTCCATAGGGCTTAGAAGAGCCACCCACCAGCCAGGCTCTTGGGTGAAGCCCTGGTG
GTTAGCAGGCAGTGAGAGCTGAGCTGACTAAGCTGGTCCACTGACCATCTGGTAGCCATCATATCTGAAGTTACTGGGCCAG
CCCCAATGAGACTGCTTCTCCCTGGGGAAGGGGAACCTTCTGCAAGAGCCAGTTACTCAGTCCAGTTACAGTTAGGTGGCC
AAGCTAAAGAGGGCTGGGGCCAGGCCAGGGGAATGTGTACAGTTGAGTCTGGAAGTTAGAGATCAACCAATCCAGTTGACT
GCTCACCAGGAACGTGCCTGAGCATCCAGGGCCGCCCGCTGCTTGGGTGCCCTGAGAGTTGTGTTGGATAGCGAGGACAT
TTAGACCTACTACTGCCAACTGGGGCTCCATAAGTCTCTGGGGTATGGCACTAATGCCTGTGCAGAAGGCTATCTGAGC
ACTTGCGGGAAAAGGAAGGACAGGAAGAGACCTCACCCCTCACCTGGTGAGGTCTCTGTTTCGGGTCTTGCCCTCTGTGA
ACCCAACTCTGCTCCTGTCCAGCACTCAGGGGGCCACTCAGAGCTGGGTCCCTCTAACCAAGCAGTCTCAGACCCCTAG
TGGTCTGCCTCTCACACTGGCCTTGGTGGAGGCTTTGTGAGACCTCACTAGCAGGTGTTGGTATGGCCAGTTCTATACTT
CTTCCAGGCTCAGGGCTCCACCCCTCTGGGGCTGCATTCCCAAAGGATGACCACTGGCCATAGCTTTCTGGTTCTCCCTCAT
CTAGCCTGTCTCGACCTGGGTGAAAAGTTCACCTATAGTAGTACTGCCGGTGAGCAGAGGCCACAAGGCTGGTTGGACTC
CGCAGAAAATCAGCTTCCAGAGGACCATGCTGGTGAGGGTGCGGTAGGAGGGGAGGGCTCACCTGTCAAGCAGGACCAG
TTTCTTCTGGCTGTCTGATCCTGCGGAAGGATTACCTTACCCTCTCAGGGCAGTTGGTGCAGTTTAATCCACTGGGGACC
TTCTTATATTGTTGGGCTCGGTGGCTCCTAGGTGCCTGAGTTGTGCCTCTGGGTAGGCTCCTTGCCCTATTGCCTGGTGT
GGGTTGCCTGGCCAGCCGCTCCCCAGAGTCCCTGTGAGGTGGATTATCCAGACTTTCGCCCTTCCCCACCCCTGCATT
TGCTTATCAATCCAGGCCATTATCCGGGTCCCTGCCCCAGCTCTGCAGTCCCTTGCTCTTGAAATGCGATCTGGCTCCAT
TGATCGCAGGCAGGGGGCTGCTCGTCCCAGCCTAGCTAGTGTGCCCGAGATTGAGCAGTTAGGGGTGCTGACAGGAT
AGGACCTCCCGCTCACACTGGAGTGGAGGGAGTGACCACTCAACTACCAGTGGCTTGCCTTAACACTTTATAATGTGA
TAAAAATGTGTGGCCTGCCTTTGGGAGGTATGTGGCCAAGAAACCAAGGTCTGCTTGTGTCCCCTGGGGACACACTCT
AGGTCAAGGTTTCAAGGAGCTTCCCTTGCCAAGCAGATCACCCAGCCCTGAACTCAGTACTGGGATCACAGATGTGGCC
ACAATTCTGGCCAGCTATAAAGCAAGTTTTTCTTGGGCAGTGGAGTCATCTCAGCACCAAGCTTAGGCCACTGGCAGTG
ACCAGCTTGAGTGTCCAGGGTTCGCTGTCATCTCTGCCCTTCCAAAACATCATCTTGGGTCTTCATCTCCCTGCCCTGCA
GGAGGACAGAGGGACCGGTGGCATTTCATCACTGGCCCTGCCAGCCAGCAGTTCCTCTAGATTATGAAATGAATCCATG
GGTGGTTTGGGGCAAAGAAGTGTACCATCTTTGGGGTCTTGAAGGCTGCAGGGGTGTGTCTTTTTGGAAGGGATGG
GTAAGGAAATCTCTGCACTTGGGAGAATGCTGTGTGGATGTGCTAATGCAGCTGTGTTCCGCTTGGCTGGCCCTGCTAGACT
GCAGTGATGGCTGTCTAGACTCTCCAGAGAAGGTCTTAGCCTAGGGTCTTCTCTCCCAGCCTCAGGGAGGAGACCACAGG
CCGGCAGTGGTTTGCCTGTGGCTTGACAAGGAAGTGGATCTATGCATTGACCTTTTACCTCCCTCCGGTGGGGGGTGG
GACAGCTGAGGAACCTTAGGCTCTGGGAATGTCAGGAAGGGATTAACAGGATGCCACCTGGGGCCCTGGTAGATGGCA
AGCTGGCCCCATGCCACTCTCTCTTGGTTACCAAGCAGGGGACTCCCTGACCCAGAGTGCACCCATTCCCAAGCTCCCAC
TGGCAGGTTCTCGGGTACAGTGCCTTTGAGAGCAGTGGCTATGGTCCATCACTGCCTAATGCCCTACACAGGACTGTG
GGTCTGTTGGGAGGGGGGAGGTGGTCTGTTGGGTGGGGGGAGGTGGCTGGAGGGCAGGCAGGGCTTGGAGAGGTTTTAC
ACTGGAACAGGACCATAACAGCCGAAGGACCATAGTCTGGACCTTGTGTTAACTGTGGGAAGAGCGCCCTCTAAAACCAC
CCTAACTGCTTCTTCTCAGCATAGGCTTACTGGTCTGGCTGCTGGAGGCCTCCACCATTCTTGGCAATGGTAGAACTACA
CCGTAAGGTAATGGGACCCGGTGGTTCTAGACTTGCCAACTATGGT
```

We used the web-based software (<http://www.cbs.dtu.dk/services/Promoter/>) to identify potential promoter sequences. As expected, the sequence has obvious characteristics of promoter.

**Supplemental table IV.** Predicted JunB binding sites in miR-182 promoter

| Model name | Score | Relative score | Start | End  | Strand | predicted site sequence |
|------------|-------|----------------|-------|------|--------|-------------------------|
| JUNB       | 1.448 | 0.808599       | 55    | 65   | 1      | CTGTGACTTAA             |
| JUNB       | 5.276 | 0.8581         | 143   | 153  | 1      | TAAAGAGTCAT             |
| JUNB       | 6.495 | 0.873863       | 145   | 155  | -1     | AGATGACTCTT             |
| JUNB       | 4.994 | 0.854453       | 334   | 344  | 1      | AAATGAGTTAG             |
| JUNB       | 0.952 | 0.802185       | 336   | 346  | -1     | ATCTAACTCAT             |
| JUNB       | 7.906 | 0.892109       | 435   | 445  | 1      | AGCTGACTAAG             |
| JUNB       | 1.842 | 0.813694       | 437   | 447  | -1     | AGCTTAGTCAG             |
| JUNB       | 5.371 | 0.859328       | 546   | 556  | 1      | CAGTTACTCAG             |
| JUNB       | 6.212 | 0.870204       | 548   | 558  | -1     | GACTGAGTAAC             |
| JUNB       | 1.786 | 0.81297        | 1458  | 1468 | -1     | CAATGAGGCAA             |
| JUNB       | 5.157 | 0.856561       | 1755  | 1765 | 1      | GAGTGACCCAC             |
| JUNB       | 4.509 | 0.848182       | 1757  | 1767 | -1     | GAGTGGGTCAC             |
| JUNB       | 3.265 | 0.832095       | 2010  | 2020 | -1     | AGATGACTCCA             |
| JUNB       | 2.73  | 0.825177       | 2290  | 2300 | 1      | GGATGGGTAAG             |

We used the web (<http://jaspar.genereg.net/>) to analyze the binding sites of JunB in miR-182 promoter sequence.



**Supplemental table VI.** Mouse Itch promoter sequence.

Mouse Itch promoter sequence was chose from start codon upstream -1938 to downstream +100 of Itch gene:

```
AAATGCAAAACCCATGTAGGCAAGCTGAGTGTGGTAATTCATGCTTGTAAATCTCATTACTGGGAAGGTTGAGCGTGAAGCAT
CCTGAGCATGAGGCCAGTCTGAGTTAGTTAGTGAGAATTTGTCCCCTAAATAAAGAAAAAACTGTAGATAAAGATTATCTGG
AACTAGATGACTTGGCTTGGAACTTGGTTTCTGTGTTAGTGATCTTGGGCCAATTAATAATTCCTTTATATTCAGTTGTTTTC
TGTACAAAATAATAAAGTAACAAAATATATTATAATATTTGTTAAAATATCTTATAGTATGCCAGTGACAAGAATCATCTGGG
ATGCTAGTTTAAAAACAAAACAAAACGAAACAAGAAACCAACCCAGATTCTCCTAGAGCACACCCTCTCAATATTGG
GGATAAAATCTTGGGCCTCATCAATGCTATGTAAGTATCTACTAGTGAGTTACATCTTGAGCCAACCTTACAGCTTAATCCCT
AATGTGGCAAACATTGGCTGGAAGTGCAGAAGAACCTTTTAAATACTTAAACACACCAAACCAAACTAAAAACAAAAAC
AAAATCCCAAAACCCAAACCCAGGGTTTCACCACGTAACCTCGGTTGGTCTAGAACTCTCAAGATATTTGGACATGGCTAG
CCTGAACCCACAGAGATCCATTGTCTCTGTCTTCTAATGGAACCTGAAGCTTGCTGTGTGGTCTAGGGCGTTGACTAGGG
AGCTCCTATGTCTGCCCACTGTTAGGGTCCGTTGGTGCCAGCTTTTATATGAATGCTGGGGTTTCAAACATCCTTGTGC
TTGCATGGCAAGAGCCTTACCCTGAACCATCCTCCCAACTCAGAATCTTTTTTGTTAATAAACTCAGCACATAATTCATA
ATATGGTAGTTTCAAAGGTATTTGAAAAAGTTTAAAGTACTTTCTAGATAGTTTCTTACGAGGAAACAGGATAAACAATAAT
AGCAAAGTTTGCTAATTATCACGTGCCTCTATTATTACCACTGCACAGCCTATTAATTCGGTAGGATTAGATGTGTTTTGCCTG
GGTTAAGAAGTTAATTTAAGCATCTGAAAAGGTAACCAATGGCATCTTTCACATAGTTTTGTGTAAACGTTTAGAAGTATG
CTTTTCAGTTTTTATAACTCATGCCGCTTGGCGCTGTCAAGCTGTACCCCTCCTAAGAACTTCCTGTCAAAAGGTGGAGAA
AGGAGAATTTGAACCCAAACAGTGTAACCTCCAGAAGGATAGAACCAGGACAGTGCTTCATAAATTGTGATTCTGCTGTTAG
GAGTATCAGGAGAGAAGTTGATAAAAATGCAGATTATAAAGCAACCCCTATTCCATCCCAGATCTACTGAGTCAGAACTGG
CGGTGGAGCTCAGCAGTCTGTTTTTAAAAGCTGTTCAAGTGATTCTGAGACAGCTAGCATTTGGTAACAGTCTTTAGAGGT
CCTGCGGGGAAGAAGGGGTCAAAAGGAAGGAACGAAAGAAGAAAGGAAAGAAGGGAGAAAGGAAAGGAGAAAGGAA
GGAAGAAAAGAAAAAGCCTTGGAGATGTAGAGAGCAAGGCTTAGTGTCCACTTCACCTGGAGGTGAGGAAAAATGATT
AGGAGGCTGGCGCGCAAGGCCTGCTGGGGCTGTAGTCCGACTGCGCCGAGGAGGCCGCGCCTGCGCACTAGGTGTGAA
GTAGCTCTAGTCTGTAGTCTGGGGCTCGGGACCGGCTGCCATCTAGCGGAGGGACTGAGGAGTCTGCGCGCCCGAGT
CCCAGTAACATGCATTTACAGTGGCCTTCTGAAACAACGCCTTAACCCTAAGAAGTGACTCAGCCATTGAGAACTTCAGG
TTTGTCTTATTGATGGTATGTCTGACAGTGGACCACAGCTTGATTCCATGGGTAGTCTGACCATGAAATCTCAACTTCAG
ATCACTGTCATCTCAGCCAACTTAAAGAAAATAAAAAGAATTGGTTTGGACCAAGTCCTTATGTAG
```

We used the web-based software (<http://www.cbs.dtu.dk/services/Promoter/>) to identify potential promoter sequences. As expected, the sequence has obvious characteristics of promoter.



**Supplemental table VII.** Predicted Foxo1 binding sites in Itch promoter

| Model name | Score  | Relative score | Start | End  | Strand | predicted site sequence |
|------------|--------|----------------|-------|------|--------|-------------------------|
| Foxo1      | 4.051  | 0.803590151    | 131   | 141  | -1     | TTTTCTTTATT             |
| Foxo1      | 3.852  | 0.800553398    | 187   | 197  | 1      | CCTTGGTTTCT             |
| Foxo1      | 11.474 | 0.916865639    | 240   | 250  | 1      | AGTTGTTTCT              |
| Foxo1      | 9.71   | 0.889946878    | 345   | 355  | -1     | TTTTGTTTTTT             |
| Foxo1      | 4.399  | 0.808900655    | 350   | 360  | -1     | TTTTGTTTTGT             |
| Foxo1      | 4.82   | 0.815325144    | 360   | 370  | -1     | TCTTGTTTCGT             |
| Foxo1      | 3.856  | 0.800614438    | 368   | 378  | -1     | GGTTGGTTTCT             |
| Foxo1      | 9.71   | 0.889946878    | 567   | 577  | -1     | TTTTGTTTTTT             |
| Foxo1      | 6.474  | 0.840565297    | 573   | 583  | -1     | TTTTGTTTTTG             |
| Foxo1      | 6.388  | 0.839252931    | 879   | 889  | 1      | TTTTGTTTAAT             |
| Foxo1      | 12.984 | 0.939908342    | 972   | 982  | -1     | TCCTGTTTCCT             |
| Foxo1      | 9.969  | 0.893899236    | 981   | 991  | -1     | TATTGTTTATC             |
| Foxo1      | 4.974  | 0.817675194    | 1226  | 1236 | -1     | ACCTTTTGACA             |
| Foxo1      | 9.616  | 0.888512432    | 1422  | 1432 | 1      | GTCTGTTTTTA             |
| Foxo1      | 5.497  | 0.82565621     | 1506  | 1516 | -1     | TCCTTTTGACC             |
| Foxo1      | 4.089  | 0.804170034    | 1569  | 1579 | -1     | TTTTCTTTTCT             |
| Foxo1      | 4.681  | 0.813203994    | 1574  | 1584 | -1     | GGCTTTTTTCT             |
| Foxo1      | 11.97  | 0.924434632    | 1810  | 1820 | -1     | GCGTGTTTACC             |

We used the web (<http://jaspar.genereg.net/>) to analyze the binding sites of Foxo1 in Itch promoter sequence.

**Supplemental table VIII.** List of anti-mouse antibodies used for flow cytometry (FC) and immunoblot (WB) analysis.

| Molecule              | Application | Species | Fluorochrome | Clone      | Manufacturer              |
|-----------------------|-------------|---------|--------------|------------|---------------------------|
| Anti-mouse antibodies |             |         |              |            |                           |
| B220                  | FC          | Mouse   | PerCP-Cy5.5  | RA3-6B2    | eBioscience               |
| B220                  | FC          | Mouse   | PerCP        | RA3-6B2    | eBioscience               |
| B220                  | FC          | Mouse   | APC          | RA3-6B2    | eBioscience               |
| B220                  | FC          | Mouse   | FITC         | RA3-6B2    | BioLegend                 |
| CD19                  | FC          | Mouse   | FITC         | 6D5        | BioLegend                 |
| CD19                  | FC          | Mouse   | APC          | 6D5        | BioLegend                 |
| IgM                   | FC          | Mouse   | FITC         | eB121-15F9 | eBioscience               |
| IgM                   | FC          | Mouse   | PE           | 11/41      | eBioscience               |
| IgD                   | FC          | Mouse   | PerCP        | 11-26c.2a  | BioLegend                 |
| IgD                   | FC          | Mouse   | PE           | 11-26c     | eBioscience               |
| IgD                   | FC          | Mouse   | FITC         | 11-26c     | eBioscience               |
| CD43                  | FC          | Mouse   | APC          | S11        | BioLegend                 |
| CD3                   | FC          | Mouse   | FITC         | 17A2       | BioLegend                 |
| CD3                   | FC          | Mouse   | PerCP        | 145-2C11   | BioLegend                 |
| CD62L                 | FC          | Mouse   | FITC         | MEL-14     | BioLegend                 |
| IL-7Ra                | FC          | Mouse   | FITC         | A7R34      | eBioscience               |
| IL-7Ra                | FC          | Mouse   | PE-Cy7       | A7R34      | eBioscience               |
| CD93                  | FC          | Mouse   | FITC         | AA4.1      | eBioscience               |
| $\mu$                 | FC          | Mouse   | APC          | II/41      | eBioscience               |
| $\kappa$              | FC          | Mouse   | APC          | 187.1      | eBioscience               |
| $\lambda$             | FC          | Mouse   | APC          | R26-46     | eBioscience               |
| CD8a                  | FC          | Mouse   | PE           | 53-6.7     | BioLegend                 |
| CD8a                  | FC          | Mouse   | FITC         | 53-6.7     | BioLegend                 |
| Foxo1                 | WB          | Rabbit  | Purified     | C29H4      | Cell Signaling Technology |
| Itch                  | WB          | Rabbit  | Purified     | D8Q6D      | Cell Signaling Technology |
| GAPDH                 | WB          | Rabbit  | Purified     | FL-335     | Santa Cruz Biotechnology  |
| IgG                   | WB          | Rabbit  | Purified     | D2814      | Santa Cruz Biotechnology  |
| RAG1                  | WB          | Rabbit  | Purified     | H-300      | Santa Cruz Biotechnology  |
| IL-7Ra                | WB          | Rabbit  | Purified     | EPR2955(2) | Abcam                     |
| CD62L                 | WB          | Rabbit  | Purified     | Ab18959    | Abcam                     |
| Ub                    | WB          | Mouse   | Purified     | AB19247    | Abcam                     |
| Ub                    | WB          | Rabbit  | Purified     | P4D1       | Santa Cruz Biotechnology  |
| JunB                  | WB          | Rabbit  | Purified     | C37F9      | Cell Signaling Technology |
| c-Fos                 | WB          | Rabbit  | Purified     | 9F6        | Cell Signaling Technology |
| p-c-Jun               | WB          | Rabbit  | Purified     | 54B3       | Cell Signaling Technology |
| c-Jun                 | WB          | Rabbit  | Purified     | 60A8       | Cell Signaling Technology |
| Notch2                | WB          | Rabbit  | Purified     | D76A6      | Cell Signaling Technology |
| STAT3                 | WB          | Rabbit  | Purified     | 79D7       | Cell Signaling Technology |

| Secondary Reagents |    |        |     |  |               |
|--------------------|----|--------|-----|--|---------------|
| IgG (H+L)          | WB | Rabbit | HRP |  | GE Healthcare |
| IgG (H+L)          | WB | Mouse  | HRP |  | GE Healthcare |

**Supplemental table IX.** List of primers for Chip-qPCR, miRNA-qPCR, Real-time quantitative PCR and PCR.

| All primers for Mus musculus         | Forward primer                           | Reverse primer                                                  | Product size                  |
|--------------------------------------|------------------------------------------|-----------------------------------------------------------------|-------------------------------|
| ChIP-qPCR primer pairs               |                                          |                                                                 |                               |
| Foxo1 promoter primer pair p1        | 5'-GTCCCACGCTTCAGTAAACT-3'               | 5'-TTCTCTAAGGCCACTGTCCC-3'                                      | 239 bp                        |
| Foxo1 promoter primer pair p2        | 5'-AAGATGCTCAGTGACGTCCC-3'               | 5'-GAGTGGGACCCTAAGCTCAA-3'                                      | 178 bp                        |
| Foxo1 promoter primer pair p3        | 5'-GCTGGATTTCATCGCCAAGAA-3'              | 5'-CTGGGAGACTCGAGTAAATGGA-3'                                    | 163 bp                        |
| Foxo1 promoter primer pair p4        | 5'-TGCTCTAAGCGCTCCTCTG-3'                | 5'-CTCCACTCATCTGAACCCC-3'                                       | 182 bp                        |
| Foxo1 promoter primer pair p5        | 5'-ACAAAAGTATGGTAGCCGCC-3'               | 5'-GAGGCGGCAGTAGGTTGG-3'                                        | 179 bp                        |
| miR-21 promoter primer pair          | 5'-CCTTTCCACCCCTCAAAAAG-3'               | 5'-TGGCGTTGGTGACTTAGTTG-3'                                      | 126 bp                        |
| miR-155 promoter primer pair         | 5'-GGTCCCCTCTGGTCTAAA-3'                 | 5'-GGGACTTGTCTCCAGCAGAG-3'                                      | 195 bp                        |
| miR-182 promoter primer pair P1      | 5'-CTCACAGATGGAGGACAGG-3'                | 5'-CATTTTGAAGGCCAGGGATA-3'                                      | 185 bp                        |
| miR-182 promoter primer pair P2      | 5'-GGTTAGCAGGCAGTGAGAGC-3'               | 5'-TGGCCACCTAACTGTAAGTGG-3'                                     | 166 bp                        |
| Itch promoter primer pair p1         | 5'-GCTTGAACCTTGGTTTCTG-3'                | 5'-GCATCCCAGATGATTCTTGTG-3'                                     | 168 bp                        |
| Itch promoter primer pair p2         | 5'-CATTGATGAGGCCAAGATT-3'                | 5'-ATGCCAGTGACAAGAATCA-3'                                       | 133 bp                        |
| Itch promoter primer pair p3         | 5'-GGATCTCTGTGGTTCAAGG-3'                | 5'-GGCTGGAAGTGCAGAAGAAC-3'                                      | 167 bp                        |
| Itch promoter primer pair p4         | 5'-GCTTGCTGTGTGGTCTAGGG-3'               | 5'-TTCTGAGTTGGGAGGATGGT-3'                                      | 163 bp                        |
| Itch promoter primer pair p5         | 5'-TGCCATTGGTTACCTTTTCA-3'               | 5'-TTTCTTACGAGGAAACAGGA-3'                                      | 161 bp                        |
| Itch promoter primer pair p6         | 5'-AAGCAACCCCTATTCCATCC-3'               | 5'-TCCTTCCTTTTGACCCCTTC-3'                                      | 158 bp                        |
| Itch promoter primer pair p7         | 5'-TGCCTTTTCATCCAAACTCC-3'               | 5'-CTGCGCACTAGGTGTGAAGT-3'                                      | 166 bp                        |
| miRNA-qPCR primer pairs              |                                          |                                                                 |                               |
| miR-21 reverse transcription primer  |                                          | 5'-GTCGTATCCAGTGCAGGGTCCGAGGT-<br>ATTCGCACTGGATACGACTCAACATC-3' |                               |
| miR-21 qPCR primer pair              | 5'-GCGCTGGAATGTAAAGAAGTtaagtaattgga-3'   | 5'-GTGCAGGGTCCGAGGT-3'                                          | 78 bp                         |
| miR-155 reverse transcription primer |                                          | 3'GTCGTATCCAGTGCAGGGTCCGAGGT-<br>ATTCGCACTGGATACGACCCCTATC-3'   |                               |
| miR-155 qPCR primer pair             | 5'-GCGCTGGAATGTAAAGAAGTtaagtaattgga-3'   | 5'-GTGCAGGGTCCGAGGT-3'                                          | 78 bp                         |
| miR-182 reverse transcription primer |                                          | 5'-GTCGTATCCAGTGCAGGGTCCGAGGT-<br>ATTCGCACTGGATACGACTGTGAGTT-3' |                               |
| miR-182 qPCR primer pair             | 5'-GCGCTGGAATGTAAAGAAGTttggcaatgtagaa-3' | 5'-GTGCAGGGTCCGAGGT-3'                                          | 78 bp                         |
| U6                                   | 5'-CTCGCTTCGGCAGCACA-3'                  | 5'-AACGCTTCACGAATTTGCGT-3'                                      | 78 bp                         |
| Real-time quantitative PCR           |                                          |                                                                 |                               |
| Foxo1 primer pair                    | 5'-TTCAATTCGCCACAATCTGTC-3'              | 5'-GGGTGATTTTCCGCTCTTGC-3'                                      | 118 bp                        |
| PCR for Genotype                     |                                          |                                                                 |                               |
| Itch floxed gene                     | 5'-ACAAGAGGTAGGAGACAAGCATT-3'            | 5'-TGCAGCTTATTTATCATTCTTA-3'                                    | wt 237 bp<br>flox/flox 270 bp |
| Foxo1 floxed gene                    | 5'-GCTTAGAGCAGAGATGTTCTCACATT            | 5'-CCAGAGTCTTTGATCAGGCAAATAA-3'                                 | WT 115bp<br>flox/flox 149 bp  |
| CD19 cre gene                        | 5'-ATTTGCCTGCATTACCGGTC-3'               | 5'-ATCAACGTTTTCTTTTCGG-3'                                       | 350 bp                        |
| CD19 WT                              | 5'-CCTCTCCCTGTCTCCTTCCT-3'               | 5'-TGGTCTGAGACATTGACAATCA-3'                                    | 490 bp                        |

**Supplemental table X.** Mouse miRNA mimics and inhibitors.

|                                 |                                           |
|---------------------------------|-------------------------------------------|
| MircoRNA Negative control (N.C) | Sense 5'-UUCUCCGAACGUGUCACGUTT-3'         |
|                                 | Antisense 5'-ACGUGACACGUUCGGAGAATT-3'     |
| MMU-miR-21 mimics               | Sense 5'-UAGCUUAUCAGACUGAUGUUGA-3'        |
|                                 | Antisense 5'-AACAUCAUCAGUCUGAUAAGCUAUU-3' |
| MMU-miR-155 mimics              | Sense 5'-UUA AUGCUAAUUGUGAUAGGGGU-3'      |
|                                 | Antisense 5'-CCCUAUCACAAUAGCAUUAUU-3'     |
| MMU-miR-182 mimics              | Sense 5'-UUUGGCAAUGGUAGAACUCACACCG-3'     |
|                                 | Antisense 5'-GUGUGAGUUCUACCAUUGCCAAAUU-3' |
| MircoRNA inhibitor N.C          | 5'-CAGUACUUUUGUGUAGUACAA-3'               |
| MMU-miR-21 inhibitor            | 5'-UCAACAUCAGUCUGAUAAGCUA-3'              |
| MMU-miR-155 inhibitor           | 5'-ACCCCUAUCACAAUAGCAUUA-3'               |
| MMU-miR-182 inhibitor           | 5'-CGGUGUGAGUUCUACCAUUGCCAAA-3'           |
